# Supplementary material for: Engineering soya bean seeds as a scalable platform to produce cyanovirin‐N, a non‐ARV microbicide against HIV
Source: PubMed Central journal article supplement — Plant Biotechnol J. 2015 Jan 9;13(7):884–92. doi: 10.1111/pbi.12309 (PMC4529388; doi:10.1111/pbi.12309), 2015-01-09

O'Keefe et al.

Table S1: GC-MS of fatty acids produced by soybean seeds (NEGC) and soybean seeds producing CV-N (CV-N).

Supporting Information

**Table S1** GC-MS of fatty acids produced by soybean seeds (NEGC) and soybean seeds producing CV-N (CV-N). Ret. Time means retention time of the compound in the column. A/H stands for area/height. Name indicates the compound identified.

| Peak# | Ret.Time NEGC | Ret.Time CV-N | A/H NEGC | Concentration (%) NEGC | A/H CV-N | Concentration (%) CV-N | Name                                                                                                |
|-------|---------------|---------------|----------|------------------------|----------|------------------------|-----------------------------------------------------------------------------------------------------|
| 1     | 13,042        | 13,043        | 2.49     | 0.07                   | 2.48     | 0.08                   | Octanoic acid, ethyl ester                                                                          |
| 2     | 27,550        | 27,554        | 2.34     | 0.12                   | 2.37     | 0.11                   | Tridecanoic acid, 12-methyl-, methyl ester                                                          |
| 3     | 29,869        | 29,874        | 2.60     | 0.83                   | 2.54     | 1.00                   | Nonanedioic acid, dimethyl ester                                                                    |
| 4     | 31,646        | 31,593        | 6.96     | 18.66                  | 5.37     | 16.99                  | Hexadecanoic acid, methyl ester (palmitic acid)                                                     |
| 5     | 31,937        | 31,921        | 2.53     | 0.15                   | 2.45     | 0.15                   | 11-Hexadecenoic acid, methyl ester                                                                  |
| 6     | 33,314        | 33,310        | 3.90     | 0.12                   | 2.87     | 0.10                   | Heptadecanoic acid, methyl ester                                                                    |
| 7     | 33,672        | 33,673        | 3.17     | 0.07                   | 2.50     | 0.07                   | Cyclopropaneoctanoic acid, 2-hexyl-, methyl ester                                                   |
| 8     | 35,269        | 35,221        | 6.91     | 4.90                   | 5.53     | 5.53                   | Heptadecanoic acid, 16-methyl-, methyl ester                                                        |
| 9     | 35,635        | 35,554        | 29.99    | 29.02                  | 6.55     | 33.39                  | 9-Octadecenoic acid, methyl ester, (Oleic acid)                                                     |
| 10    | 36,398        | 36,329        | 8.67     | 34.19                  | 6.21     | 30.76                  | 9,12-Octadecadienoic acid, methyl ester (linoleic)                                                  |
| 11    | 37,283        | 37,249        | 3.39     | 2.00                   | 2.66     | 1.78                   | 9,12,15-Octadecatrienoic acid, methyl ester (linolenic)                                             |
| 12    | 37,626        | 37,613        | 7.89     | 0.16                   | 3.48     | 0.15                   | 6,9-Octadecadienoic acid, methyl ester                                                              |
| 13    | 38,660        | 38,655        | 8.85     | 0.54                   | 3.90     | 0.50                   | 6,9-Octadecadienoic acid, methyl ester                                                              |
| 14    | 38,957        | 38,953        | 6.24     | 0.41                   | 3.89     | 0.23                   | 3-Methoxy-N-methylsulfonylbenzenecarboximidamide                                                    |
| 15    | 39,480        | 39,473        | 3.95     | 0.24                   | 2.97     | 0.14                   | 4,4,8,10,14-Pentamethyl-17-(perhydro-2,6,6-trimethyl-2H-pyran-2-yl)-Salpha-gorane-3beta,12beta-diol |
| 16    | 40,718        | 40,720        | 5.85     | 0.19                   | 3.98     | 0.09                   | 9,12,15-Octadecatrienoic acid, methyl ester (linolenic)                                             |
| 17    | 41,058        | 41,048        | 4.09     | 1.23                   | 3.76     | 1.06                   | 9,12,15-Octadecatrienoic acid, methyl ester (linolenic)                                             |
| 18    | 41,325        | 41,314        | 4.11     | 1.11                   | 3.43     | 0.99                   | 9,12,15-Octadecatrienoic acid, methyl ester (linolenic)                                             |
| 19    | 41,583        | 41,589        | 4.13     | 0.56                   | 4.84     | 0.49                   | Tricosanoic acid                                                                                    |
| 20    | 41,756        | 41,742        | 6.95     | 3.18                   | 3.12     | 1.45                   | 9,12,15-Octadecatrienoic acid, methyl ester (linolenic)                                             |

O'Keefe et al.

Figure S1: LC-MS (electrospray ionization) spectrum and deconvoluted ion set for the purified rCV-N showing the expected molecular weight of 11,009 Da.

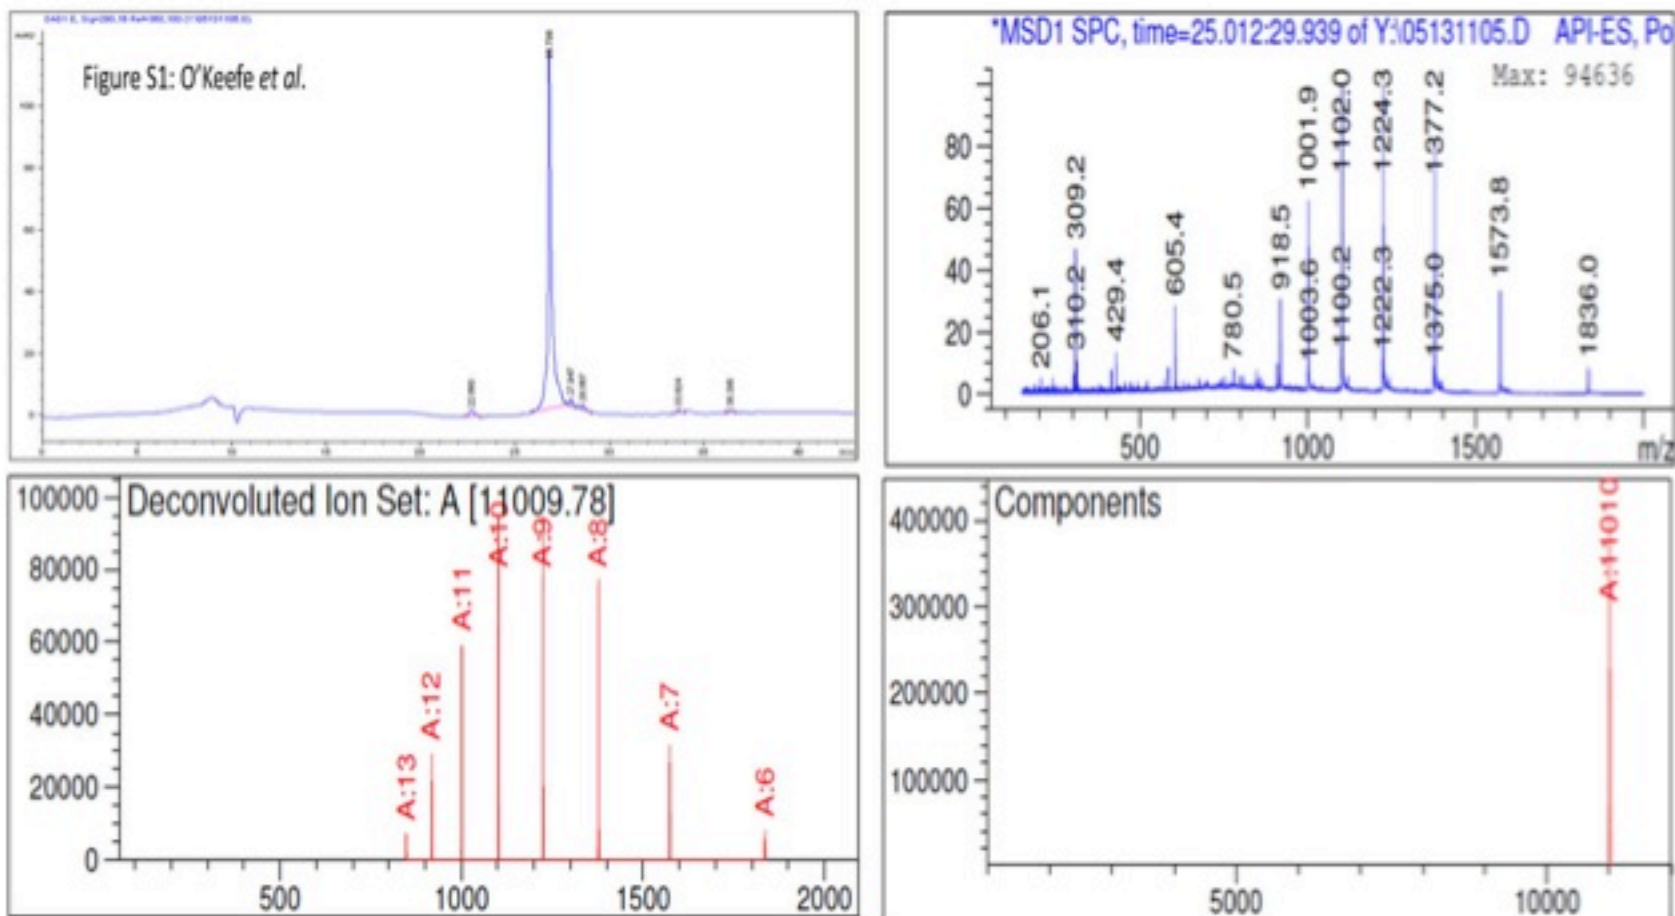

O'Keefe et al.

Figure S2: Dot-blot of oil and protein extracts from non-transgenic and transgenic  $T_3$  seeds submitted to standard defat processing.

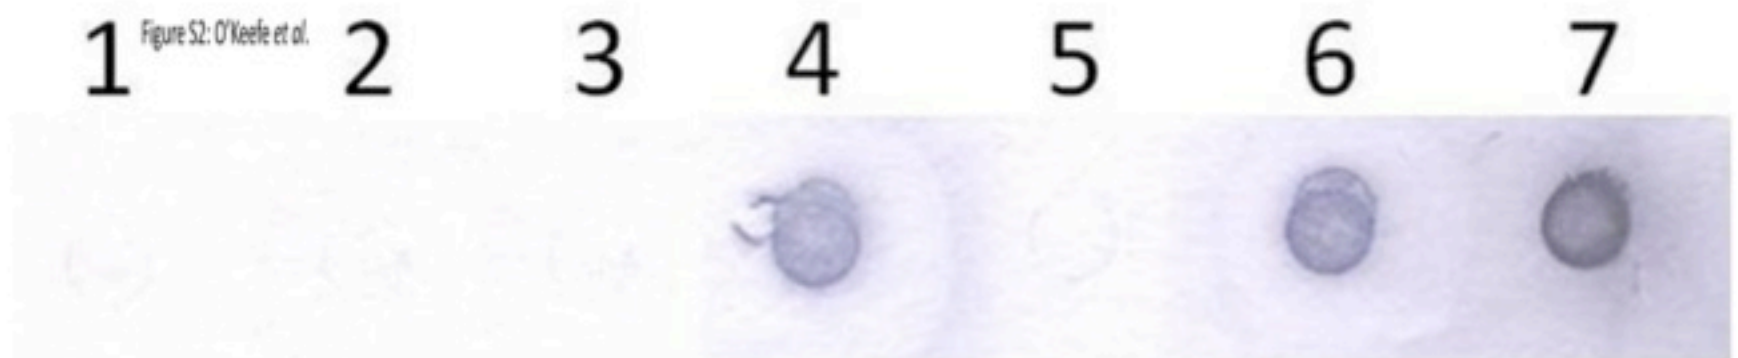

Supplement: NIHMS712780-supplement-Supp_TableS1___FigureS1-S2.pdf [file NIHMS712780-supplement-Supp_TableS1___FigureS1-S2.pdf]
